# Supplementary material for: Understanding a ligand's effects on intra-cluster and inter-cluster assembly
Source: Royal Society of Chemistry journal article supplement (doi:10.1039/d2nr01765b), 2022-01-01
Supplement: d2nr01765b1.pdf [file d2nr01765b1.pdf]

*Supporting information for*

**Understanding the Ligand's Effects on Intra-cluster and Inter-cluster  
Assembly**

Li Tang,<sup>a‡</sup> Zhengmao Yin,<sup>a‡</sup> Ru Wang,<sup>a</sup> Bin Wang,<sup>a</sup> Kefan Jiang,<sup>a</sup> Mei Ding,<sup>a</sup> and Shuxin Wang<sup>\*a</sup>

*<sup>a</sup>College of Materials Science and Engineering, Qingdao University of Science and Technology,  
Qingdao 266042, P. R. China*

<sup>‡</sup>These authors contributed equally to this work.

\*E-mails of corresponding authors: shuxin\_wang@qust.edu.cn

Notes: The authors declare no competing financial interest.

This Supporting Information includes:

Figures S1-S11

Tables S1-S5

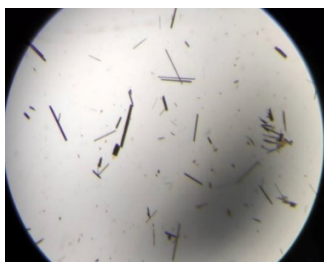

**Figure S1.** An optical microscopic image of the single crystals of **Cd<sub>12</sub>Ag<sub>32</sub>-2**.

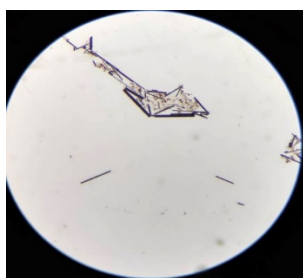

**Figure S2.** An optical microscopic image of the single crystals of **Cd<sub>12</sub>Ag<sub>32</sub>-1**.

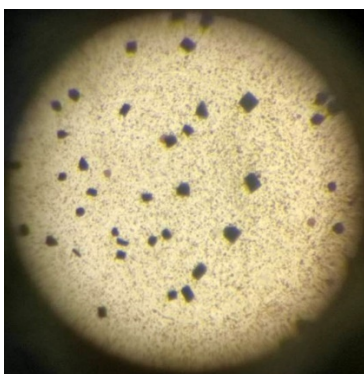

**Figure S3.** An optical microscopic image of the single crystals of **Cd<sub>12</sub>Ag<sub>32</sub>-3**.

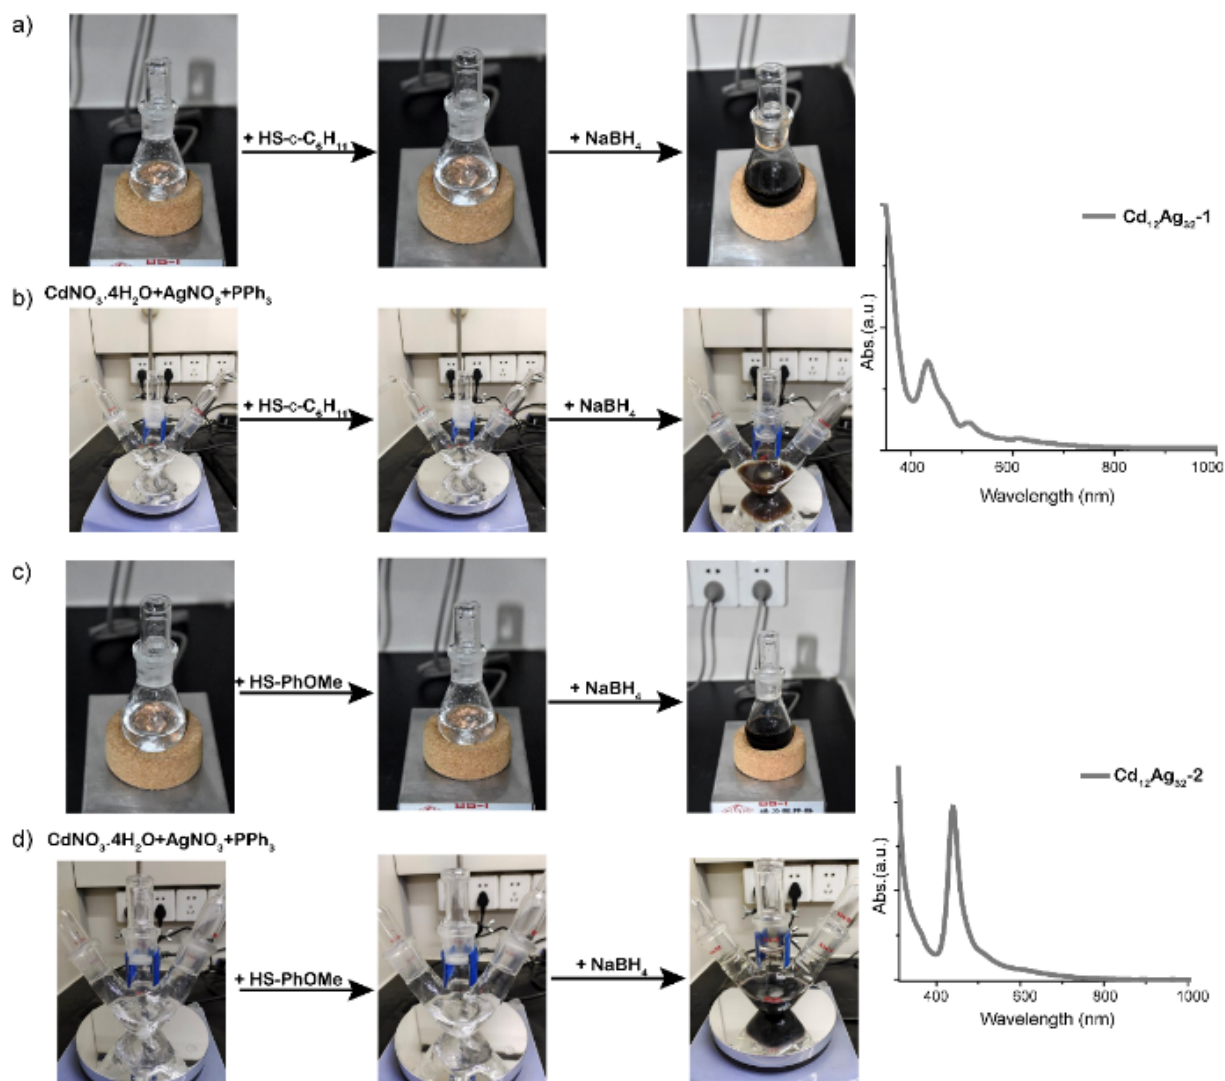

**Figure S4.** The digital photographs describing the synthesis of Cd<sub>12</sub>Ag<sub>32</sub>-1 and Cd<sub>12</sub>Ag<sub>32</sub>-2, respectively. a), c) under Ar<sub>2</sub> atmosphere; b), d) in air atmosphere.

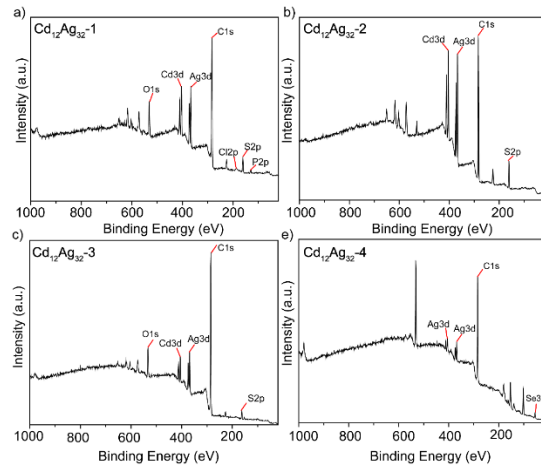

**Figure S5.** X-ray photoelectron spectrum (XPS) of the nanocluster. a),  $\text{Cd}_{12}\text{Ag}_{32}$ -1, b),  $\text{Cd}_{12}\text{Ag}_{32}$ -2, c),  $\text{Cd}_{12}\text{Ag}_{32}$ -3, d),  $\text{Cd}_{12}\text{Ag}_{32}$ -4.

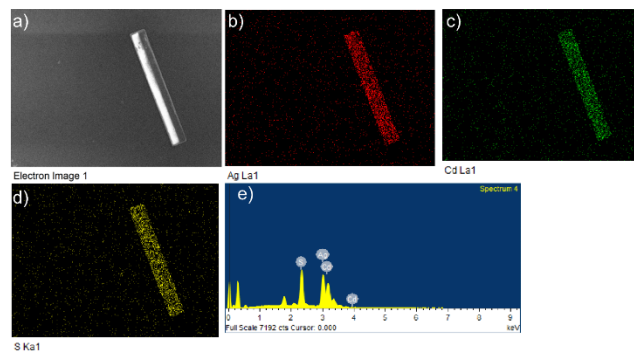

**Figure S6.** (a) SEM image of a small deformed single crystal of  $\text{Cd}_{12}\text{Ag}_{32}$ -1. (b-d) are the elemental maps of Ag, Cd and S, respectively. (e) EDS spectrum, confirming the presence of above elements in the cluster, which is consistent with the cluster composition obtained by SCXRD data.

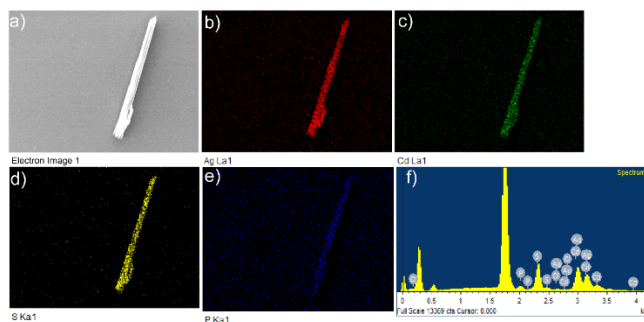

**Figure S7.** (a) SEM image of a small deformed single crystal of  $\text{Cd}_{12}\text{Ag}_{32}$ -2. (b-d) are the elemental maps of Ag, Cd and S, respectively. (e) EDS spectrum, confirming the presence of above elements in the cluster, which is consistent with the cluster composition obtained by SCXRD data.

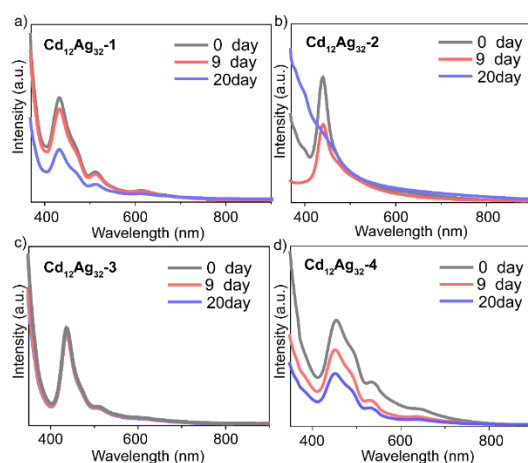

**Figure S8.** Monitoring the ambient stability of **Cd<sub>12</sub>Ag<sub>32</sub>-1**, **Cd<sub>12</sub>Ag<sub>32</sub>-2**, **Cd<sub>12</sub>Ag<sub>32</sub>-3** and **Cd<sub>12</sub>Ag<sub>32</sub>-4** in solution, respectively, using UV-vis spectroscopy.

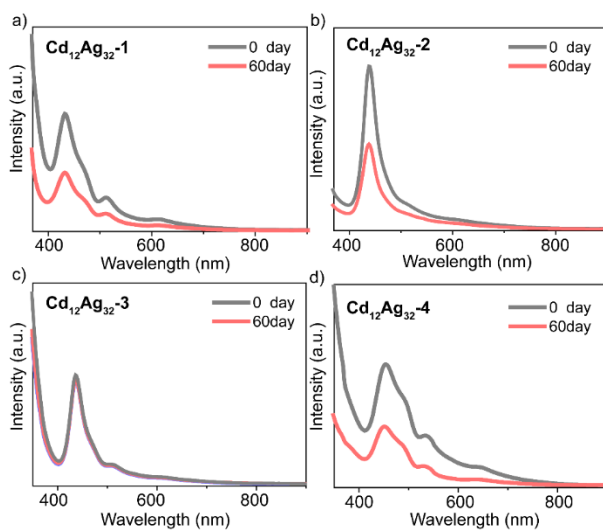

**Figure S9.** Monitoring the ambient stability of **Cd<sub>12</sub>Ag<sub>32</sub>-1**, **Cd<sub>12</sub>Ag<sub>32</sub>-2**, **Cd<sub>12</sub>Ag<sub>32</sub>-3** and **Cd<sub>12</sub>Ag<sub>32</sub>-4** in solid state, respectively, using UV-vis spectroscopy.

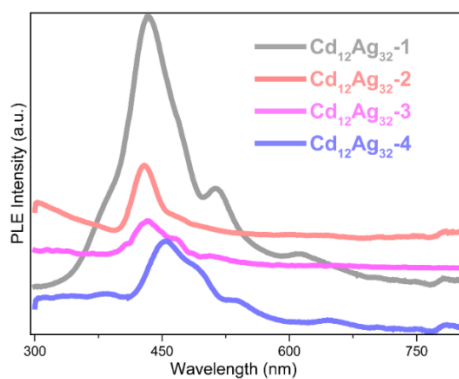

**Figure S10.** PL excitation (PLE) spectra of **Cd<sub>12</sub>Ag<sub>32</sub>-1**, **Cd<sub>12</sub>Ag<sub>32</sub>-2** and **Cd<sub>12</sub>Ag<sub>32</sub>-3**.

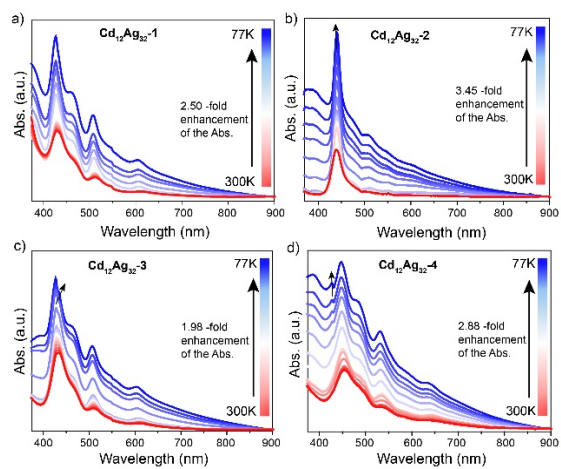

**Figure S11.** Temperature-dependent UV-vis spectra of Cd<sub>12</sub>Ag<sub>32</sub>-1, Cd<sub>12</sub>Ag<sub>32</sub>-2, Cd<sub>12</sub>Ag<sub>32</sub>-3 and Cd<sub>12</sub>Ag<sub>32</sub>-4.

**Table S1.** The atomic ratio of Ag and Cd in **Cd<sub>12</sub>Ag<sub>32</sub>-1** and **Cd<sub>12</sub>Ag<sub>32</sub>-2** was calculated from X-ray photoelectric spectroscopy (XPS) and ICP measurements.

| <b>Cd<sub>12</sub>Ag<sub>32</sub>-1</b>                     | <b>Cd (%)</b> | <b>Ag (%)</b> |
|-------------------------------------------------------------|---------------|---------------|
| XPS results                                                 | 31.52         | 68.48         |
| ICP results                                                 | 31.39         | 68.61         |
| <b>Cd<sub>12</sub>Ag<sub>32</sub>-1 theoretical results</b> | 18/58 (31.03) | 40/58 (68.97) |
| <b>Cd<sub>12</sub>Ag<sub>32</sub>-2</b>                     | <b>Cd (%)</b> | <b>Ag (%)</b> |
| XPS results                                                 | 27.6          | 72.4          |
| ICP results                                                 | 27.55         | 72.45         |
| <b>Cd<sub>12</sub>Ag<sub>32</sub>-2 theoretical results</b> | 12/44 (27.27) | 32/44(72.73)  |
| <b>Cd<sub>12</sub>Ag<sub>32</sub>-3</b>                     | <b>Cd (%)</b> | <b>Ag (%)</b> |
| XPS results                                                 | 27.01         | 72.99         |
| ICP results                                                 | 27.70         | 72.30         |
| <b>Cd<sub>12</sub>Ag<sub>32</sub>-3 theoretical results</b> | 12/44 (27.27) | 32/44(72.73)  |

**Table S2.** List of bond lengths in **Cd<sub>12</sub>Ag<sub>32</sub>**, **Cd<sub>12</sub>Ag<sub>32</sub>-2** and **Cd<sub>12</sub>Ag<sub>32</sub>-3**.

| <b>Bond type/Location</b>                       | <b>Cd<sub>12</sub>Ag<sub>32</sub>-1</b> |                    | <b>Cd<sub>12</sub>Ag<sub>32</sub>-2</b> |                    | <b>Cd<sub>12</sub>Ag<sub>32</sub>-3</b> |                    | <b>Cd<sub>12</sub>Ag<sub>32</sub>-4</b> |                    |
|-------------------------------------------------|-----------------------------------------|--------------------|-----------------------------------------|--------------------|-----------------------------------------|--------------------|-----------------------------------------|--------------------|
|                                                 | <b>range (Å)</b>                        | <b>average (Å)</b> |
| Ag-Ag/(within Ag <sub>4</sub> inner core)       | 2.845-2.857                             | 2.851              | 2.853-2.909                             | 2.876              | 2.811-2.811                             | 2.811              | 2.834-2.863                             | 2.847              |
| Ag-Ag/(Ag <sub>4</sub> -Ag <sub>24</sub> layer) | 2.675-3.071                             | 2.831              | 2.668-3.172                             | 2.841              | 2.772-3.031                             | 2.828              | 2.673-3.156                             | 2.838              |
| Ag-Ag/(within the Ag <sub>24</sub> layer)       | 2.813-3.173                             | 2.949              | 2.791-3.16                              | 2.956              | 2.772-3.061                             | 2.913              | 2.805-3.160                             | 2.956              |
| Ag-S/Se/(Ag <sub>24</sub> layer-S/Se)           | 2.492-2.525                             | 2.506              | 2.403-2.572                             | 2.502              | 2.497-2.518                             | 2.507              | 2.575-2.640                             | 2.604              |
| Ag-S/Se/(within the ligand motif)               | 2.618-2.624                             | 2.611              | 2.418-2.562                             | 2.495              | 2.721-2.721                             | 2.721              | 2.571-2.638                             | 2.600              |
| Ag-Cd/(within the ligand motif)                 | <b>4.10-4.24</b>                        | <b>4.18</b>        | 3.334-3.633                             | 3.51               | 3.571-3.571                             | 3.571              | 3.520-3.701                             | 3.63               |
| Cd-S/Se/(within the ligand motif)               | 2.451-2.504                             | 2.535              | 2.408-2.669                             | 2.492              | 2.547-2.646                             | 2.583              | 2.565-2.734                             | 2.643              |
| Ag-P/( within the ligand motif)                 | 2.503-2.516                             | 2.506              | -                                       | -                  | -                                       | -                  | -                                       | -                  |

**Table S3.** Crystal data and structure refinement of **Cd<sub>12</sub>Ag<sub>32</sub>-1**.

|                                          |                                                                                                                                     |
|------------------------------------------|-------------------------------------------------------------------------------------------------------------------------------------|
| Empirical formula                        | Cd <sub>18</sub> Ag <sub>40</sub> Cl <sub>8</sub> P <sub>12</sub> S <sub>48</sub> C <sub>552</sub> H <sub>468</sub> O <sub>48</sub> |
| Formula weight                           | 16401.97                                                                                                                            |
| Temperature/K                            | 170 K                                                                                                                               |
| Crystal system                           | trigonal                                                                                                                            |
| Space group                              | P-3                                                                                                                                 |
| a/Å                                      | 33.2637(4)                                                                                                                          |
| b/Å                                      | 33.2637(4)                                                                                                                          |
| c/Å                                      | 28.1094(3)                                                                                                                          |
| α /°                                     | 90                                                                                                                                  |
| β /°                                     | 90                                                                                                                                  |
| γ /°                                     | 120                                                                                                                                 |
| Volume/Å <sup>3</sup>                    | 26935.4(7)                                                                                                                          |
| Z                                        | 1                                                                                                                                   |
| ρ <sub>calc</sub> g/cm <sup>3</sup>      | 1.510                                                                                                                               |
| μ/mm                                     | 15.853                                                                                                                              |
| F(000)                                   | 11892                                                                                                                               |
| Crystal size/mm <sup>3</sup>             | 0.15 x 0.1 x 0.08                                                                                                                   |
| Radiation                                | CuKα (1.54186 Å)                                                                                                                    |
| 2θ range for data collection/°           | 4.060 to 64.992                                                                                                                     |
| Index ranges                             | -38 ≤ h ≤ 38, -30 ≤ k ≤ 39, -33 ≤ l ≤ 14                                                                                            |
| Reflections collected                    | 83427                                                                                                                               |
| Independent reflections                  | 30227[R <sub>int</sub> = 0.0373, R <sub>sigma</sub> = 0.0541]                                                                       |
| Data/restraints/parameters               | 30227/3810/1367                                                                                                                     |
| Goodness-of-fit on F <sup>2</sup>        | 1.154                                                                                                                               |
| Final R indexes [I ≥ 2σ(I)]              | R1 = 0.0855, wR2 = 0.2681                                                                                                           |
| Final R indexes [all data]               | R1 = 0.1151, wR2 = 0.2894                                                                                                           |
| Largest diff. peak/hole/eÅ <sup>-3</sup> | 21.837/-2.094                                                                                                                       |



**Table S4.** Crystal data and structure refinement of **Cd<sub>12</sub>Ag<sub>32</sub>-2**.

|                                           |                                                                                     |
|-------------------------------------------|-------------------------------------------------------------------------------------|
| Empirical formula                         | C <sub>216</sub> H <sub>390</sub> Ag <sub>32</sub> Cd <sub>12</sub> S <sub>36</sub> |
| Formula weight                            | 9842.06                                                                             |
| Temperature/K                             | 170K                                                                                |
| Crystal system                            | orthorhombic                                                                        |
| Space group                               | Pca21                                                                               |
| a/Å                                       | 30.8174(5)                                                                          |
| b/Å                                       | 28.5803(9)                                                                          |
| c/Å                                       | 39.1573(7)                                                                          |
| $\alpha$ /°                               | 90                                                                                  |
| $\beta$ /°                                | 90                                                                                  |
| $\gamma$ /°                               | 90                                                                                  |
| Volume/Å <sup>3</sup>                     | 34488.6(14)                                                                         |
| Z                                         | 4                                                                                   |
| $\rho_{\text{calc}}$ g/cm <sup>3</sup>    | 1.722                                                                               |
| $\mu$ /mm                                 | 22.257                                                                              |
| F(000)                                    | 17368                                                                               |
| Crystal size/mm <sup>3</sup>              | 0.12 x 0.1 x 0.08                                                                   |
| Radiation                                 | CuK $\alpha$ (1.54184 Å)                                                            |
| 2 $\theta$ range for data collection/°    | 2.868 to 64.997                                                                     |
| Index ranges                              | -35 $\leq$ h $\leq$ 36, -32 $\leq$ k $\leq$ 33, -30 $\leq$ l $\leq$ 40              |
| Reflections collected                     | 109831                                                                              |
| Independent reflections                   | 44911[R <sub>int</sub> = 0.1318, R <sub>sigma</sub> = 0.1380]                       |
| Data/restraints/parameters                | 44911/3951/2666                                                                     |
| Goodness-of-fit on F <sup>2</sup>         | 0.970                                                                               |
| Final R indexes [I $\geq$ 2 $\sigma$ (I)] | R1 = 0.0923, wR2 = 0.2333                                                           |
| Final R indexes [all data]                | R1 = 0.1419, wR2 = 0.2655                                                           |
| Largest diff. peak/hole/eÅ <sup>-3</sup>  | 1.957/-1.234                                                                        |

**Table S5.** Crystal data and structure refinement of **Cd<sub>12</sub>Ag<sub>32</sub>S<sub>36</sub>**.

|                                           |                                                                       |
|-------------------------------------------|-----------------------------------------------------------------------|
| Empirical formula                         | Ag <sub>32</sub> Cd <sub>12</sub> S <sub>36</sub>                     |
| Formula weight                            | 5954.80                                                               |
| Temperature/K                             | 120K                                                                  |
| Crystal system                            | cubic                                                                 |
| Space group                               | Fm-3                                                                  |
| a/Å                                       | 32.067(8)                                                             |
| b/Å                                       | 32.067(8)                                                             |
| c/Å                                       | 32.067(8)                                                             |
| $\alpha$ /°                               | 90                                                                    |
| $\beta$ /°                                | 90                                                                    |
| $\gamma$ /°                               | 90                                                                    |
| Volume/Å <sup>3</sup>                     | 32975(25)                                                             |
| Z                                         | 4                                                                     |
| $\rho_{\text{calc}}$ g/cm <sup>3</sup>    | 1.199                                                                 |
| $\mu$ /mm                                 | 23.040                                                                |
| F(000)                                    | 10624                                                                 |
| Crystal size/mm <sup>3</sup>              | 0.1 x 0.1 x 0.1                                                       |
| Radiation                                 | CuK $\alpha$ (1.54186 Å)                                              |
| 2 $\theta$ range for data collection/°    | 4.573 to 56.784                                                       |
| Index ranges                              | -28 $\leq$ h $\leq$ 24, -33 $\leq$ k $\leq$ 19, -34 $\leq$ l $\leq$ 9 |
| Reflections collected                     | 5301                                                                  |
| Independent reflections                   | 1857[R <sub>int</sub> = 0.0713, R <sub>sigma</sub> = 0.0846]          |
| Data/restraints/parameters                | 1857/0/61                                                             |
| Goodness-of-fit on F <sup>2</sup>         | 0.920                                                                 |
| Final R indexes [I $\geq$ 2 $\sigma$ (I)] | R1 = 0.0930, wR2 = 0.2571                                             |
| Final R indexes [all data]                | R1 = 0.1563, wR2 = 0.3163                                             |
| Largest diff. peak/hole/eÅ <sup>-3</sup>  | 0.733/-1.235                                                          |
